# Supplementary material
Source: PubMed Central journal article supplement (PMC3519389)
Supplement: NIHMS373055-supplement-supplement_1.pdf [file NIHMS373055-supplement-supplement_1.pdf]

Supplemental Table 1

|                      | Nephrotic<br>(n=49) | Diabetic<br>(n=10) | Nephritic<br>(n=31) | Other<br>(n=9) |
|----------------------|---------------------|--------------------|---------------------|----------------|
| Age                  | 55.1 (17.5)*        | 60.0 (8.4)*        | 40.1 (13.0)         | 63.7 (10.6)*   |
| Male (%)             | 71.4                | 70.0               | 61.3                | 77.8           |
| Creatinine           | 1.4 (0.9)           | 2.6 (2.3)          | 1.5 (1.0)           | 2.2 (0.7)      |
| GFR                  | 68.3 (33.6)         | 49.2 (32.0)        | 64.9 (29.9)         | 36.8 (23.4)#   |
| Uprotein             | 8.0 (6.8)           | 8.6 (7.2)*         | 3.1 (2.8) †         | 3.2 (1.9)      |
| %Diabetes            | 6.1                 | 100.0              | 3.2                 | 77.8           |
| %Hypertension        | 71.4                | 80.0               | 51.6                | 11.1           |
| NGAL blot<br>mg/gCr  | 74.5 (126.3)        | 315.7 (499.6)      | 35.3 (45.6)         | 96.4 (158.8)   |
| NGAL blot<br>(ng/ml) | 57.3 (112.0)        | 164.0 (304.3)      | 20.0 (21.9)         | 55.7 (65.1)    |

\* <.01 compared to nephritic † <.01 compared to nephrotic # <.05 compared to nephrotic.

"Other" includes nephroangiosclerosis, ESRD prior to dialysis initiation, light chain nephritis, myeloma, and isolated chronic tubulo-interstitial nephritis.

1057x793mm (72 x 72 DPI)
